# Supplementary material for: Impaired fasting glucose, type 2 diabetes mellitus, and lifetime risk of cardiovascular disease among women and men: the Rotterdam Study
Source: HighWire-hosted journal article supplement (doi:10.1136/bmjdrc-2021-002406), 2021-08-01
Supplement: bmjdrc-2021-002406supp001_data_supplement.pdf [file bmjdrc-2021-002406supp001_data_supplement.pdf]

**Online Supplement:****Table S1** Remaining lifetime risk of first incident cardiovascular disease across the glycaemic spectrum among overweight/obese and normal BMI categories

|                  | Sex   | Normoglycemia                   |                          | Impaired fasting glucose        |                          | Type 2 diabetes                 |                          |
|------------------|-------|---------------------------------|--------------------------|---------------------------------|--------------------------|---------------------------------|--------------------------|
|                  |       | Cumulative incidence, % (95%CI) |                          | Cumulative incidence, % (95%CI) |                          | Cumulative incidence, % (95%CI) |                          |
|                  |       | BMI $\geq$ 25 kg/m <sup>2</sup> | BMI<25 kg/m <sup>2</sup> | BMI $\geq$ 25 kg/m <sup>2</sup> | BMI<25 kg/m <sup>2</sup> | BMI $\geq$ 25 kg/m <sup>2</sup> | BMI<25 kg/m <sup>2</sup> |
| N events/N total | Women | 499/2777                        | 241/1691                 | 119/509                         | 30/125                   | 157/508                         | 25/88                    |
|                  | Men   | 400/1830                        | 208/923                  | 123/468                         | 24/102                   | 110/382                         | 45/98                    |
| <b>Age 55</b>    | Women | 58.2 (54.1-62.2)                | 43.8 (38.8-48.9)         | 56.4 (48.6-64.2)                | 48.5 (34.6-62.5)         | 64.7 (57.5-71.6)                | 42.8 (25.5-60.1)         |
|                  | Men   | 60.8 (56.4-65.2)                | 55.4 (49.4-61.4)         | 66.1 (58.3-74.0)                | 56.9 (40.6-73.1)         | 55.8 (47.2-64.4)                | 75.1 (61.5-88.8)         |
| <b>Age 65</b>    | Women | 58.0 (53.9-62.2)                | 43.5 (38.3-48.6)         | 55.8 (47.8-63.8)                | 50.4 (36.4-64.4)         | 64.4 (59.4-71.4)                | 43.0 (25.9-60.1)         |
|                  | Men   | 56.7 (52.7-62.5)                | 51.2 (44.9-57.5)         | 64.3 (56.1-72.6)                | 48.8 (32.6-65.0)         | 52.6 (43.3-61.9)                | 64.8 (49.9-79.6)         |
| <b>Age 75</b>    | Women | 56.0 (51.3-60.7)                | 42.3 (36.4-48.1)         | 53.0 (43.5-62.5)                | 55.2 (39.4-70.9)         | 59.8 (51.9-67.9)                | 46.4 (30.7-66.1)         |
|                  | Men   | 54.6 (48.4-60.8)                | 44.8 (37.3-52.3)         | 62.6 (52.3-73.0)                | 41.4 (22.9-59.9)         | 48.3 (36.7-60.0)                | 54.0 (37.8-70.3)         |
| <b>Age 85</b>    | Women | 49.8 (43.0-56.5)                | 35.4 (27.8-42.9)         | 49.6 (37.9-61.4)                | 49.0 (25.7-72.3)         | 48.0 (36.5-59.8)                | 46.1 (22.7-69.6)         |
|                  | Men   | 52.2 (41.4-63.0)                | 39.4 (27.1-51.6)         | 57.6 (38.8-76.5)                | 22.3 (-0.4-48.6)         | 41.3 (20.1-62.5)                | 50.9 (24.7-77.0)         |

**Abbreviations:** NG, normoglycemia; IFG, impaired fasting glucose; T2D, type 2 diabetes; CL; confidence interval; CVD, cardiovascular disease

An overall test comparing sub-hazard distributions across the glucose spectrum by the Fine-Gray method.

## Sensitivity analysis

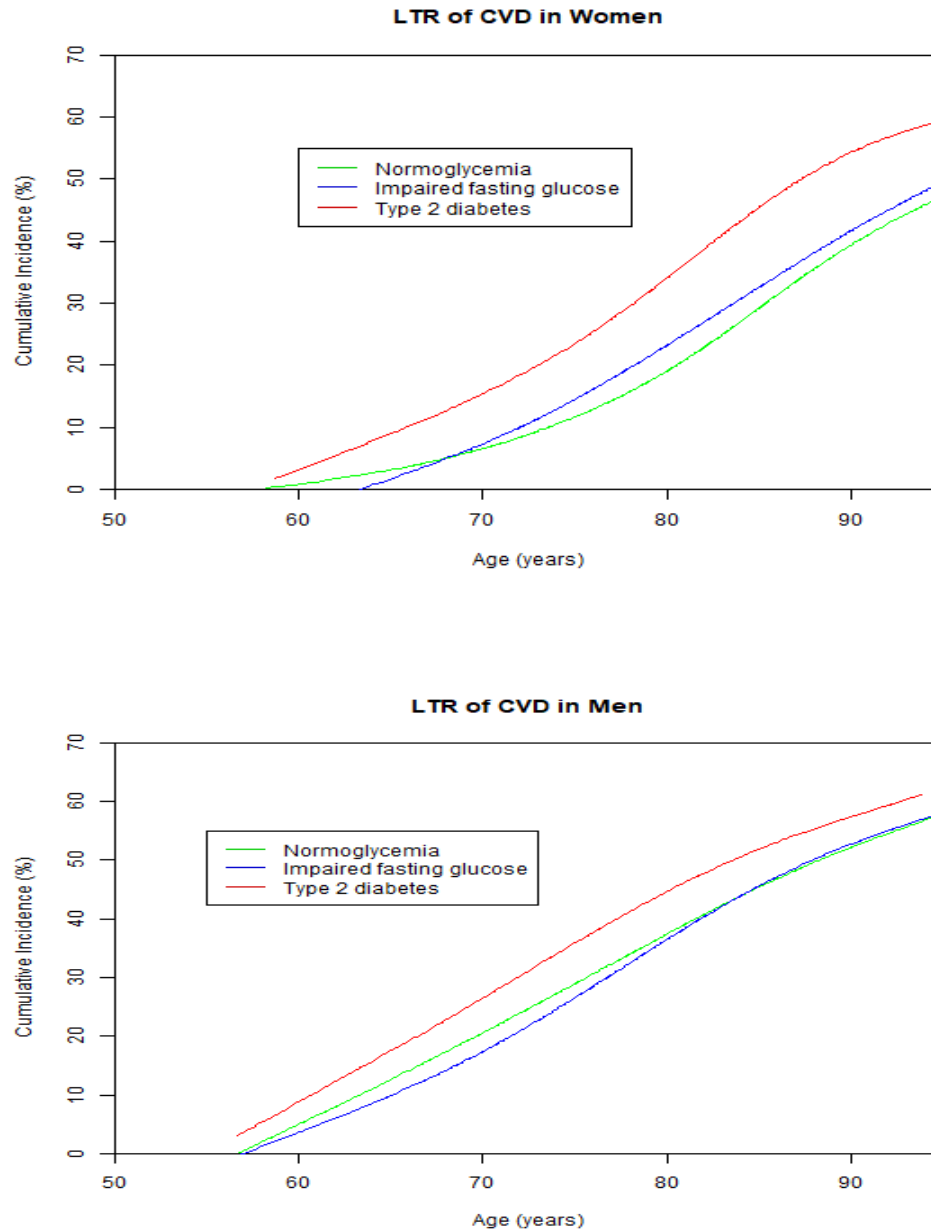

**Figure S1.** Cumulative incidence of cardiovascular disease defined as the composite endpoint of coronary heart disease, heart failure, and stroke in individuals aged 55 years, adjusted for the competing risk of death, adjusted for the competing risk of death.

Impaired fasting glucose defined based on the ADA guideline (5.6-6.9 mmol/l)

LTR; the lifetime risk; CVD, cardiovascular diseases
